# Supplementary material for: Self-reported provision of person-centred maternity care among providers in Kenya and Ghana: scale validation and examination of associated factors
Source: HighWire-hosted journal article supplement (doi:10.1136/bmjgh-2021-007415), 2021-11-01

## Supplementary Tables

Table S1: PCMC questions

|                                                                                                                                                                                                                                                                                                                           |                                                                                           |
|---------------------------------------------------------------------------------------------------------------------------------------------------------------------------------------------------------------------------------------------------------------------------------------------------------------------------|-------------------------------------------------------------------------------------------|
| <p>Now I am going to ask some questions about your interactions with patients.<br/> It is understood that in clinical work, there are many demands and constraints that providers face that affect our interactions with patients.<br/> Thinking of your interactions with your patients in the last month....</p>        |                                                                                           |
| 1. Do you introduce yourself to patients when you first see them?<br>(If they just say yes, ask will you say this was a few times, most of the time, or all the time)                                                                                                                                                     | 0, 0 No, never<br>1, 1 Yes, a few times<br>2, 2 Yes, most of the time<br>3, 3 Yes, always |
| 2. Do you call patients by their name when talking to them?<br>For example: asked a patient, how are you Monica? Not when you have their folder and calling them to be seen                                                                                                                                               | 0, 0 No, never<br>1, 1 Yes, a few times<br>2, 2 Yes, most of the time<br>3, 3 Yes, always |
| 3. Do you explain to patients the purpose of examinations or procedures before proceeding?                                                                                                                                                                                                                                | 0, 0 No, never<br>1, 1 Yes, a few times<br>2, 2 Yes, most of the time<br>3, 3 Yes, always |
| 4. Do you explain to patients why they are being given some medication?                                                                                                                                                                                                                                                   | 0, 0 No, never<br>1, 1 Yes, a few times<br>2, 2 Yes, most of the time<br>3, 3 Yes, always |
| 5. Do you ask patients if they have any questions?                                                                                                                                                                                                                                                                        | 0, 0 No, never<br>1, 1 Yes, a few times<br>2, 2 Yes, most of the time<br>3, 3 Yes, always |
| 6. Do you allow women to have a birth companion of their choice?                                                                                                                                                                                                                                                          | 0, 0 No, never<br>1, 1 Yes, a few times<br>2, 2 Yes, most of the time<br>3, 3 Yes, always |
| 7. Do you allow women to give birth in which ever delivery position they prefer?                                                                                                                                                                                                                                          | 0, 0 No, never<br>1, 1 Yes, a few times<br>2, 2 Yes, most of the time<br>3, 3 Yes, always |
| 8. Other providers have stated that sometimes women behave in a way that make them react strongly to the situation. Sometimes this is spontaneous. Other times we think we need to do something to save or protect the baby<br><br>In the last month, have you shouted at, scolded, or threatened a woman for any reason? | 0, 0 No, never<br>1, 1 Yes, a few times<br>2, 2 Yes, most of the time<br>3, 3 Yes, always |
| 9. In the last month, have you pinched, hit, or physically restrained a woman for any reason?                                                                                                                                                                                                                             | 0, 0 No, never<br>1, 1 Yes, a few times<br>2, 2 Yes, most of the time<br>3, 3 Yes, always |

**Table S2: Health facility level characteristics of the study population in each country**

| Characteristics                                                                               | Category                 | Country        |               | P      |
|-----------------------------------------------------------------------------------------------|--------------------------|----------------|---------------|--------|
|                                                                                               |                          | Kenya (N=25)   | Ghana (N=18)  |        |
| Facility type                                                                                 | Govt. Hospital           | 10 (40.0)      | 8 (44.4)      | 0.69   |
|                                                                                               | Govt. Health Center      | 11 (44.0)      | 9 (50.0)      |        |
|                                                                                               | Mission/Private Hospital | 4 (16.0)       | 1 (5.6)       |        |
| Doctors/clinical officers available to work in the maternity unit                             | Median (range)           | 0 (0,3)        | 0(0,4)        | 0.18   |
| Nurses or midwives available to work in the maternity unit                                    | Median (range)           | 7 (1,15)       | 9 (3,34)      | 0.064  |
| Auxiliary staff working on the maternity ward                                                 | Median (range)           | 2 (1,5)        | 1.5 (0,21)    | 0.27   |
| Clinical providers (i.e., doctors, clinical officers, nurses/midwives) on duty during the day | Median (range)           | 2 (1,5)        | 3.5 (1,18)    | <0.001 |
| Clinical providers on duty at night                                                           | Median (range)           | 1 (0,3)        | 3 (1,5)       | 0.0050 |
| Total deliveries for the last year                                                            | Median (range)           | 441 (105,4800) | 398 (68,3379) | 0.69   |
| Are cesarian sections performed in this facility                                              | No, never                | 21 (84.0)      | 10 (33.6)     | 0.23   |
|                                                                                               | Yes, sometimes           | 1 (4.0)        | 2 (11.1)      |        |
|                                                                                               | Yes, most of the time    | 1 (4.0)        | 2 (11.1)      |        |
|                                                                                               | Yes, always              | 2 (8.0)        | 4 (22.2)      |        |
| Facility has magnesium sulphate                                                               | No, never                | 0 (0.0)        | 1 (5.6)       | 0.22   |
|                                                                                               | Yes, sometimes           | 3 (12.0)       | 4 (22.2)      |        |
|                                                                                               | Yes, most of the time    | 12 (48.0)      | 4 (22.2)      |        |
|                                                                                               | Yes, always              | 10 (40.0)      | 9 (50.0)      |        |
| Facility has Intravenous fluids                                                               | No, never                | 0 (0.0)        | 0 (0.0)       | 0.17   |
|                                                                                               | Yes, sometimes           | 5 (20.0)       | 0 (0.0)       |        |
|                                                                                               | Yes, most of the time    | 8 (32.0)       | 7 (38.9)      |        |
|                                                                                               | Yes, always              | 12 (48.0)      | 11 (61.1)     |        |
| Facility has blood for transfusion                                                            | No, never                | 13 (52.0)      | 9 (50.0)      | 0.0010 |
|                                                                                               | Yes, sometimes           | 8 (32.0)       | 1 (5.6)       |        |
|                                                                                               | Yes, most of the time    | 4 (16.0)       | 1 (5.6)       |        |
|                                                                                               | Yes, always              | 0 (0.0)        | 7 (38.8)      |        |
| Facility has antibiotics                                                                      | No, never                | 0 (0.0)        | 0 (0.0)       | 0.78   |
|                                                                                               | Yes, sometimes           | 5 (20.8)       | 2 (11.1)      |        |
|                                                                                               | Yes, most of the time    | 9 (37.5)       | 7 (38.9)      |        |
|                                                                                               | Yes, always              | 10 (41.7)      | 9 (50.0)      |        |
| Facility has uterotonics                                                                      | No, never                | 2 (8.3)        | 1 (5.6)       | 1.0    |
|                                                                                               | Yes, sometimes           | 2 (8.3)        | 1 (5.6)       |        |
|                                                                                               | Yes, most of the time    | 9 (37.5)       | 7 (38.9)      |        |
|                                                                                               | Yes, always              | 11 (45.8)      | 9 (50.0)      |        |
| Are supplies for conducting deliveries such as gloves and cotton wool consistent              | No, never                | 2 (8.0)        | 0 (0.0)       | 0.15   |
|                                                                                               | Yes, sometimes           | 7 (28.0)       | 1 (5.6)       |        |
|                                                                                               | Yes, most of the time    | 7 (28.0)       | 8 (44.4)      |        |
|                                                                                               | Yes, always              | 9 (36.0)       | 9 (50.0)      |        |
| Have consistent electricity                                                                   | No, never                | 1 (4.0)        | 0 (0.0)       | 0.0050 |
|                                                                                               | Yes, sometimes           | 9 (36.0)       | 0 (0.0)       |        |
|                                                                                               | Yes, most of the time    | 6 (24.0)       | 11 (61.1)     |        |
|                                                                                               | Yes, always              | 9 (36.0)       | 7 (38.9)      |        |
| Have consistent running water from a tap                                                      | No, never                | 5 (20.0)       | 0 (0.0)       | 0.085  |
|                                                                                               | Yes, sometimes           | 8 (32.0)       | 3 (16.7)      |        |
|                                                                                               | Yes, most of the time    | 4 (16.0)       | 6 (33.3)      |        |

|                                                   | Yes, always    | 8 (32.0)       | 9 (50.0)          |        |
|---------------------------------------------------|----------------|----------------|-------------------|--------|
| Target population                                 | Median (range) | 528 (66,12787) | 6676 (1204,31532) | <0.001 |
| Number of women who attended ANC at least 4 times | Median (range) | 281 (48-1117)  | 419 (98,1913)     | 0.030  |
| Total number of admissions                        | Median (range) | 588 (112,4800) | 367 (68,5672)     | 1.0    |
| Total number of deliveries                        | Median (range) | 441 (105,4800) | 398 (68,3379)     | 0.69   |
| Number of fresh stillbirths                       | Median (range) | 2 (0,91)       | 1 (0,50)          | 0.67   |
| Number of macerated stillbirths                   | Median (range) | 2 (0,84)       | 0 (0,69)          | 0.013  |
| Number of preterm babies                          | Median (range) | 15 (0,114)     | 2 (0,524)         | 0.95   |
| Number of neonatal deaths                         | Median (range) | 2 (0,14)       | 0(0,104)          | 0.88   |
| Total number of maternal deaths                   | Median (range) | 0 (0,14)       | 0 (0,8)           | 0.044  |
| Number of referrals                               | Median (range) | 41 (0-200)     | 54 (8,1292)       | 0.19   |

**Table S3: Distribution of PCMC items by country**

| Characteristic                                                                         | Category              | Country    |            |
|----------------------------------------------------------------------------------------|-----------------------|------------|------------|
|                                                                                        |                       | Kenya      | Ghana      |
| Do you introduce yourself to patients when you first see them?                         | No, never             | 21 (25.0)  | 15 (10.0)  |
|                                                                                        | Yes, a few times      | 32 (38.1)  | 48 (32.0)  |
|                                                                                        | Yes, most of the time | 23 (27.4)  | 55 (36.7)  |
|                                                                                        | Yes, always           | 8 (9.5)    | 32 (21.3)  |
| Do you call patients by their name when talking to them?                               | No, never             | 3 (3.5)    | 2 (1.3)    |
|                                                                                        | Yes, a few times      | 32 (37.2)  | 31 (20.8)  |
|                                                                                        | Yes, most of the time | 35 (40.7)  | 66 (44.3)  |
|                                                                                        | Yes, always           | 16 (18.6)  | 50 (33.6)  |
| Do you explain to patients the purpose of examinations or procedures?                  | No, never             | 3 (3.5)    | 0 (0.0)    |
|                                                                                        | Yes, a few times      | 17 (20.0)  | 7 (4.7)    |
|                                                                                        | Yes, most of the time | 42 (49.4)  | 69 (46.0)  |
|                                                                                        | Yes, always           | 23 (27.1)  | 74 (49.3)  |
| Do you explain to patients why they are being given some medication?                   | No, never             | 4 (4.7)    | 3 (2.0)    |
|                                                                                        | Yes, a few times      | 23 (27.1)  | 19 (12.7)  |
|                                                                                        | Yes, most of the time | 35 (41.2)  | 45 (30.0)  |
|                                                                                        | Yes, always           | 23 (27.1)  | 83 (55.3)  |
| Do you ask patients if they have any questions?                                        | No, never             | 18 (21.2)  | 1 (0.7)    |
|                                                                                        | Yes, a few times      | 26 (30.6)  | 39 (26.0)  |
|                                                                                        | Yes, most of the time | 27 (31.8)  | 50 (33.3)  |
|                                                                                        | Yes, always           | 14 (16.4)  | 60 (40.0)  |
| Do you allow women to have a birth companion of their choice?                          | No, never             | 4 (4.7)    | 3 (2.0)    |
|                                                                                        | Yes, a few times      | 7 (8.2)    | 11 (7.4)   |
|                                                                                        | Yes, most of the time | 23 (27.1)  | 30 (20.1)  |
|                                                                                        | Yes, always           | 51 (60.03) | 105 (70.5) |
| Do you allow women to give birth in which ever delivery position they prefer?          | No, never             | 33 (38.4)  | 46 (31.1)  |
|                                                                                        | Yes, a few times      | 26 (30.2)  | 41 (27.7)  |
|                                                                                        | Yes, most of the time | 19 (22.1)  | 30 (20.3)  |
|                                                                                        | Yes, always           | 8 (9.3)    | 31 (20.9)  |
| In the last month, have you shouted at, scolded, or threatened a woman for any reason? | No, never             | 28 (32.9)  | 58 (38.7)  |
|                                                                                        | Yes, a few times      | 36 (42.4)  | 89 (59.3)  |
|                                                                                        | Yes, most of the time | 20 (23.5)  | 3 (2.0)    |
|                                                                                        | Yes, always           | 1 (1.2)    | 0 (0.0)    |
| In the last month, have you pinched, hit, or physically restrained a woman             | No, never             | 59 (68.6)  | 137 (91.3) |
|                                                                                        | Yes, a few times      | 26 (30.2)  | 13 (8.7)   |
|                                                                                        | Yes, most of the time | 1 (1.2)    | 0 (0.0)    |
|                                                                                        | Yes, always           | 0 (0.0)    | 0 (0.0)    |

**Table S4: Bivariate analysis of PCMC score at different health facility level characteristics**

| Characteristics                                                                  | Category                 | PCMC score |                    | p      |
|----------------------------------------------------------------------------------|--------------------------|------------|--------------------|--------|
|                                                                                  |                          | N          | Median (range)     |        |
| Facility type                                                                    | Govt. Hospital           | 16         | 57.1 (35.71,82.14) | 0.24   |
|                                                                                  | Govt. Health Center/Disp | 22         | 60.7 (46.43,96.43) |        |
|                                                                                  | Mission/Private Hospital | 5          | 57.1 (48.21,78.57) |        |
| Doctors available to work in the maternity unit                                  |                          |            | Rho=0.04           | 0.77   |
| Nurses or midwives are available to work in the maternity unit                   |                          |            | Rho=-0.16          | 0.30   |
| Clinical providers available to work in the maternity unit                       |                          |            | Rho=-0.42          | 0.0050 |
| Auxiliary staff work on the maternity ward                                       |                          |            | Rho=-0.06          | 0.71   |
| clinical providers (I.e., doctors, Cos, nurses/midwives) are on duty at day      |                          |            | Rho=0.40           | 0.0080 |
| clinical providers (I.e., doctors, Cos, nurses/midwives) are on duty at night    |                          |            | Rho=0.07           | 0.67   |
| Total deliveries for the last year                                               |                          |            | Rho=-0.15          | 0.35   |
| Are cesarian sections performed in this facility                                 | No, never                | 31         | 60.7 (35.71,96.43) | 0.30   |
|                                                                                  | Yes, sometimes           | 3          | 64.3 (39.29,67.86) |        |
|                                                                                  | Yes, most of the time    | 3          | 50.0 (48.21,57.14) |        |
|                                                                                  | Yes, always              | 6          | 67.9 (53.57,78.57) |        |
| Facility has magnesium sulphate                                                  | No, never                | 1          | 60.7 (60.71,60.71) | 0.41   |
|                                                                                  | Yes, sometimes           | 7          | 76.3 (35.71,96.43) |        |
|                                                                                  | Yes, most of the time    | 16         | 55.4 (39.29,82.14) |        |
|                                                                                  | Yes, always              | 19         | 67.9 (45.92,92.86) |        |
| Facility has Intravenous fluids                                                  | No, never                | 0          |                    | 0.048  |
|                                                                                  | Yes, sometimes           | 4          | 48.2 (35.71,64.29) |        |
|                                                                                  | Yes, most of the time    | 15         | 57.1 (39.29,96.43) |        |
|                                                                                  | Yes, always              | 24         | 67.9 (42.86,92.86) |        |
| Facility has blood for transfusion                                               | No, never                | 22         | 60.7 (42.86,96.43) | 0.71   |
|                                                                                  | Yes, sometimes           | 9          | 53.6 (35.71,92.86) |        |
|                                                                                  | Yes, most of the time    | 5          | 57.1 (39.29,67.86) |        |
|                                                                                  | Yes, always              | 7          | 67.9 (39.29,78.57) |        |
| Facility has antibiotics                                                         | No, never                | 0          |                    | 0.83   |
|                                                                                  | Yes, sometimes           | 7          | 64.3 (35.71,92.86) |        |
|                                                                                  | Yes, most of the time    | 16         | 60.5 (39.29,96.43) |        |
|                                                                                  | Yes, always              | 19         | 67.9 (42.86,92.86) |        |
| Facility has uterotonics                                                         | No, never                | 3          | 60.3 (42.86,60.71) | 0.63   |
|                                                                                  | Yes, sometimes           | 3          | 64.3 (50.00,67.86) |        |
|                                                                                  | Yes, most of the time    | 16         | 57.1 (39.29,96.43) |        |
|                                                                                  | Yes, always              | 20         | 67.9 (35.71-92.86) |        |
| Are supplies for conducting deliveries such as gloves and cotton wool consistent | No, never                | 2          | 55.4 (46.43,64.29) | 0.11   |
|                                                                                  | Yes, sometimes           | 8          | 51.8 (35.71,67.86) |        |
|                                                                                  | Yes, most of the time    | 16         | 66.1 (39.29,96.43) |        |
|                                                                                  | Yes, always              | 17         | 67.9 (42.86,82.14) |        |
| Have consistent electricity                                                      | No, never                | 1          | 42.9 (42.86,42.86) | 0.22   |
|                                                                                  | Yes, sometimes           | 8          | 51.8 (35.71,92.86) |        |
|                                                                                  | Yes, most of the time    | 18         | 66.1 (39.29,96.43) |        |
|                                                                                  | Yes, always              | 16         | 64.3 (48.21,92.86) |        |
| Have consistent running water from a tap                                         | No, never                | 6          | 48.2 (35.71,92.86) | 0.23   |
|                                                                                  | Yes, sometimes           | 10         | 60.5 (46.43,76.34) |        |
|                                                                                  | Yes, most of the time    | 10         | 53.6 (39.29,96.43) |        |
|                                                                                  | Yes, always              | 17         | 67.9 (45.92,92.86) |        |
| Target population                                                                |                          |            | Rho=0.10           | 0.51   |
| Number of women who attended ANC at least 4 times                                |                          |            | Rho=0.10           | 0.51   |
| Total number of admissions                                                       |                          |            | Rho=-0.09          | 0.56   |
| Number of fresh stillbirths                                                      |                          |            | Rho=-0.14          | 0.36   |
| Number of macerated stillbirths                                                  |                          |            | Rho=-0.16          | 0.29   |
| Number of preterm babies                                                         |                          |            | Rho=-0.23          | 0.14   |
| Number of neonatal deaths                                                        |                          |            | Rho=-0.226         | 0.16   |
| Total number of maternal deaths                                                  |                          |            | Rho=-0.08          | 0.60   |
| Number of referrals                                                              |                          |            | Rho=-0.003         | 0.98   |

**Table S5: Structural equation model for mediation by Burnout levels on PCMC score**

| Characteristic                               | Category                  | Total effect         | Direct effect        | Indirect effect     |
|----------------------------------------------|---------------------------|----------------------|----------------------|---------------------|
| Burnout level                                |                           | -0.33 (-0.48,-0.18)  | -0.33 (-0.48,-0.18)  |                     |
| Perceived stress                             |                           | -0.57 (-0.87,-0.26)  | -0.24 (-0.56,0.09)   | -0.33 (-0.50,-0.16) |
| Age                                          |                           | 0.26 (0.02,0.49)     | 0.26 (0.02,0.49)     |                     |
| Religion                                     | Catholic                  |                      |                      |                     |
|                                              | Seventh Day Adventist     | -6.60 (-12.39,-0.80) | -6.60 (-12.39,-0.80) |                     |
|                                              | Methodist/Presby/Anglican | -0.95 (-5.03,3.13)   | -0.95 (-5.03,3.13)   |                     |
| Health facility type                         | Govt. Hospital            |                      |                      |                     |
|                                              | Govt. Health Center/Disp  | 7.47 (3.45,11.49)    | 7.47 (3.45,11.49)    |                     |
|                                              | Mission/Private Hospital  | 5.30 (0.72,9.88)     | 5.30 (0.72,9.88)     |                     |
| Training on how to help you deal with stress | No                        |                      |                      |                     |
|                                              | Yes                       | 4.15 (-0.16,8.45)    | 4.15 (-0.16,8.45)    |                     |
| Number of providers during day               |                           | 0.43 (0.01,0.84)     | 0.43 (0.01,0.84)     |                     |
| Country                                      | Kenya                     |                      |                      |                     |
|                                              | Ghana                     | 4.58 (-0.72,9.88)    | 4.58 (-0.72,9.88)    |                     |
| Overall R-squared                            |                           | 0.41                 |                      |                     |

**Supplemental Figure 1: Screen Plot from Factor Analysis of 9 PCMC Items**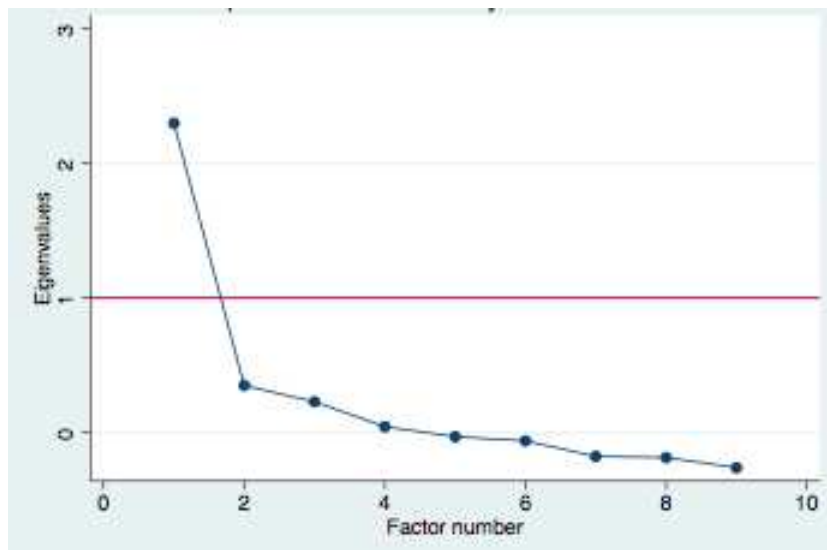

Supplement: bmjgh-2021-007415supp001_data_supplement.pdf [file bmjgh-2021-007415supp001_data_supplement.pdf]
